# Supplementary material for: Maternal Nutrition, Body Composition and Gestational Weight Gain on Low Birth Weight and Small for Gestational Age—A Cohort Study in an Indian Urban Slum
Source: MDPI journal article supplement (doi:10.3390/children9101460), 2022-09-23
Supplement: s1 [file s1]

## Supplementary\_files

**Supple Table-S1: Median Intake of Food Groups by Pregnant Women and Its Implications on Birth Weight and Small for Gestational Age**

| Food groups                           | RDA<br>2020 | Birth Weight |        |        |        | <i>p</i> | Weight for gestational age |        |        |        | <i>p</i> |
|---------------------------------------|-------------|--------------|--------|--------|--------|----------|----------------------------|--------|--------|--------|----------|
|                                       |             | LBW          |        | NBW    |        |          | SGA                        |        | AGA    |        |          |
|                                       |             | Median       | IQR    | Median | IQR    |          | Median                     | IQR    | Median | IQR    |          |
| Cereals and Millets (g)               | 325         | 361.77       | 234.11 | 376.47 | 230.24 | 0.508    | 376.89                     | 230.26 | 368.85 | 227.09 | 0.519    |
| Pulses and Legumes (g)                | 90          | 24.29        | 66.08  | 23.48  | 64.19  | 0.503    | 22.4                       | 63.22  | 23.19  | 63.3   | 0.807    |
| Meat, Poultry, Fish and Sea foods (g) | 50          | 0.24         | 44.05  | 26.03  | 50     | 0.252    | 11.2                       | 50     | 26.03  | 51.74  | 0.164    |
| Fats and Edible Oils (g)              | 25          | 20.73        | 20.32  | 21.36  | 19.73  | 0.84     | 21.35                      | 19.7   | 21.57  | 19.37  | 0.609    |
| Milk and Milk Products (g)            | 400         | 224.7        | 193.03 | 231.48 | 255.78 | 0.47     | 217.6                      | 238.36 | 238.7  | 254.12 | 0.458    |
| Nuts and Oil seeds (g)                | 40          | 2.78         | 16.62  | 2.95   | 16.62  | 0.914    | 2.7                        | 14.91  | 3.3    | 20.84  | 0.411    |
| Green leafy and other Vegetables (g)  | 300         | 49.18        | 113.22 | 31.21  | 81.94  | 0.094    | 36.85                      | 85.79  | 30.39  | 85.66  | 0.145    |
| Roots and tubers (g)                  | 100         | 33.37        | 44.01  | 30.06  | 49.84  | 0.739    | 31.89                      | 45.01  | 28.7   | 51.62  | 0.473    |
| Fruits (g)                            | 150         | 75.32        | 104.67 | 76.76  | 117.4  | 0.544    | 75.63                      | 112    | 74.81  | 124.9  | 0.521    |

RDA. Recommended Dietary Allowance; LBW, low birth weight; NBW, normal birth weight; SGA, small for gestational age; AGA, appropriate for gestational age. Groups were compared using Mann-Whitney U-test. Birth weight <2.5 kg=LBW. Infant birth weight <10 percentiles for the gestational age and gender=SGA

**Supple Table S2: Birth weight and small for gestational age based on maternal macro and micronutrient intakes**

| Macro and Micro Nutrients                      | EAR 2020 | Birth Weight |        |        |        | <i>p</i> value | Weight for Gestational Age |         |         |         | <i>p</i> value |
|------------------------------------------------|----------|--------------|--------|--------|--------|----------------|----------------------------|---------|---------|---------|----------------|
|                                                |          | LBW          |        | Normal |        |                | AGA                        |         | SGA     |         |                |
|                                                |          | Median       | IQR    | Median | IQR    |                | Median                     | IQR     | Median  | IQR     |                |
| Energy (Kcal)                                  | 2480     | 2310.9       | 929.87 | 2418.5 | 1216.8 | 0.282          | 2369.24                    | 1204.47 | 2403.48 | 1123.39 | 0.858          |
| Protein (g)                                    | 54       | 62.32        | 33.46  | 64.37  | 37.81  | 0.396          | 64.05                      | 36.82   | 64.65   | 36.34   | 0.937          |
| Total Fat (g)                                  | 30       | 51.6         | 33.46  | 56.39  | 41.05  | 0.621          | 57.63                      | 44.30   | 52.33   | 33.60   | 0.371          |
| Thiamine (mg)                                  | 1.6      | 1.04         | .66    | 1.06   | .65    | 0.470          | 1.04                       | .64     | 1.07    | .65     | 0.662          |
| Riboflavin (mg)                                | 2.3      | 0.89         | .46    | 0.89   | .49    | 0.523          | 0.89                       | .46     | 0.89    | .50     | 0.982          |
| Niacin (mg)                                    | 14       | 9.98         | 6.87   | 10.76  | 6.52   | 0.405          | 10.2                       | 6.37    | 10.8    | 6.38    | 0.663          |
| Dietary folate (µg)                            | 480      | 217.5        | 168.88 | 191.38 | 139.00 | 0.552          | 190.96                     | 145.82  | 197.56  | 138.73  | 0.856          |
| Vitamin C (mg)                                 | 65       | 45.54        | 49.22  | 45.99  | 44.86  | 0.807          | 45.99                      | 46.46   | 44.8    | 43.94   | 0.382          |
| Vitamin A (µg)                                 | 406      | 195.96       | 247.72 | 202.39 | 217.84 | 0.959          | 202.11                     | 222.88  | 201.56  | 215.23  | 0.378          |
| Iron (mg)                                      | 21       | 10.32        | 6.41   | 9.91   | 6.72   | 0.513          | 9.72                       | 6.81    | 10.27   | 6.55    | 0.599          |
| Zinc (mg)                                      | 12       | 8.02         | 4.53   | 8.05   | 4.96   | 0.600          | 7.64                       | 5.07    | 8.15    | 4.33    | 0.58           |
| Calcium (mg)                                   | 800      | 543.54       | 385.09 | 494.07 | 360.15 | 0.544          | 511.05                     | 353.79  | 495.08  | 363.28  | 0.77           |
| Groups were compared using Mann-Whitney U-test |          |              |        |        |        |                |                            |         |         |         |                |

**Supple Table S3: Birth weight and Small for Gestational age of Children based on Intake of Food group tertiles**

|                        |                      | Birth Weight |      |     |      |       |      | <i>p</i> value | Weight for gestational age |      |     |      |       |      | <i>p</i> value |
|------------------------|----------------------|--------------|------|-----|------|-------|------|----------------|----------------------------|------|-----|------|-------|------|----------------|
|                        |                      | LBW          |      | NBW |      | Total |      |                | AGA                        |      | SGA |      | Total |      |                |
|                        |                      | n            | %    | n   | %    | n     | %    |                | n                          | %    | n   | %    | n     | %    |                |
| Cereals and Millets    | 1st Tertile(<307)    | 27           | 34.6 | 135 | 32.1 | 162   | 32.5 | 0.831          | 83                         | 34.0 | 77  | 31.7 | 160   | 32.9 | 0.88           |
|                        | 2nd Tertile(307-455) | 27           | 34.6 | 145 | 34.5 | 172   | 34.5 |                | 82                         | 33.6 | 87  | 35.8 | 169   | 34.7 |                |
|                        | 3rd Tertile(≥456)    | 24           | 30.8 | 140 | 33.3 | 164   | 32.9 |                | 79                         | 32.4 | 79  | 32.5 | 158   | 32.4 |                |
| Pulses and Legumes     | 1st Tertile(<5)      | 22           | 28.2 | 139 | 33.1 | 161   | 32.3 | 0.852          | 79                         | 32.4 | 80  | 32.9 | 159   | 32.6 | 0.662          |
|                        | 2nd Tertile(5-49)    | 29           | 37.2 | 139 | 33.1 | 168   | 33.7 |                | 86                         | 35.2 | 80  | 32.9 | 166   | 34.1 |                |
|                        | 3rd Tertile(≥50)     | 27           | 34.6 | 142 | 33.8 | 169   | 33.9 |                | 79                         | 32.4 | 83  | 34.2 | 162   | 33.3 |                |
| Fats and Edible Oils   | 1st Tertile(<16)     | 26           | 33.3 | 138 | 32.9 | 164   | 32.9 | 0.671          | 76                         | 31.1 | 84  | 34.6 | 160   | 32.9 | 0.538          |
|                        | 2nd Tertile(16-27)   | 30           | 38.5 | 139 | 33.1 | 169   | 33.9 |                | 83                         | 34.0 | 82  | 33.7 | 165   | 33.9 |                |
|                        | 3rd Tertile(≥28)     | 22           | 28.2 | 143 | 34.0 | 165   | 33.1 |                | 85                         | 34.8 | 77  | 31.7 | 162   | 33.3 |                |
| Milk and Milk Products | 1st Tertile(<144)    | 26           | 33.3 | 134 | 31.9 | 160   | 32.1 | 0.945          | 80                         | 32.8 | 79  | 32.5 | 159   | 32.6 | 0.553          |
|                        | 2nd Tertile(144-292) | 30           | 38.5 | 142 | 33.8 | 172   | 34.5 |                | 82                         | 33.6 | 85  | 35.0 | 167   | 34.3 |                |
|                        | 3rd Tertile(≥293)    | 22           | 28.2 | 144 | 34.3 | 166   | 33.3 |                | 82                         | 33.6 | 79  | 32.5 | 161   | 33.1 |                |
| Nuts and Oil seeds     | 1st Tertile(<1)      | 34           | 43.6 | 155 | 36.9 | 189   | 38.0 | 0.79           | 89                         | 36.5 | 95  | 39.1 | 184   | 37.8 | 0.291          |
|                        | 2nd Tertile(1-7)     | 16           | 20.5 | 121 | 28.8 | 137   | 27.5 |                | 69                         | 28.3 | 63  | 25.9 | 132   | 27.1 |                |
|                        | 3rd Tertile(≥8)      | 28           | 35.9 | 144 | 34.3 | 172   | 34.5 |                | 86                         | 35.2 | 85  | 35.0 | 171   | 35.1 |                |
| Vegetables             | 1st Tertile(<12)     | 23           | 29.5 | 138 | 32.9 | 161   | 32.3 | 0.257          | 87                         | 35.7 | 70  | 28.8 | 157   | 32.2 | 0.147          |
|                        | 2nd Tertile(12-68)   | 22           | 28.2 | 151 | 36.0 | 173   | 34.7 |                | 78                         | 32.0 | 89  | 36.6 | 167   | 34.3 |                |
|                        | 3rd Tertile(≥69)     | 33           | 42.3 | 131 | 31.2 | 164   | 32.9 |                | 79                         | 32.4 | 84  | 34.6 | 163   | 33.5 |                |
| Roots and tubers       | 1st Tertile(<18)     | 25           | 32.1 | 138 | 32.9 | 163   | 32.7 | 0.157          | 89                         | 36.5 | 70  | 28.8 | 159   | 32.6 | 0.65           |
|                        | 2nd Tertile(18-45)   | 29           | 37.2 | 135 | 32.1 | 164   | 32.9 |                | 74                         | 30.3 | 89  | 36.6 | 163   | 33.5 |                |
|                        | 3rd Tertile(≥46)     | 24           | 30.8 | 147 | 35.0 | 171   | 34.3 |                | 81                         | 33.2 | 84  | 34.6 | 165   | 33.9 |                |
| Fruits                 | 1st Tertile(<42)     | 28           | 35.9 | 137 | 32.6 | 165   | 33.1 | 0.549          | 84                         | 34.4 | 79  | 32.5 | 163   | 33.5 | 0.809          |
|                        | 2nd Tertile(42-119)  | 26           | 33.3 | 140 | 33.3 | 166   | 33.3 |                | 76                         | 31.1 | 87  | 35.8 | 163   | 33.5 |                |
|                        | 3rd Tertile(≥120)    | 24           | 30.8 | 143 | 34.0 | 167   | 33.5 |                | 84                         | 34.4 | 77  | 31.7 | 161   | 33.1 |                |

Groups were compared based on categories using Chi-square test
